# Supplementary material for: Continuous Exposure to Non-Soluble β-Glucans Induces Trained Immunity in M-CSF-Differentiated Macrophages
Source: PubMed Central journal article supplement (PMC8208035; doi:10.3389/fimmu.2021.672796), 2021-06-02
Supplement: DataSheet_1.pdf [file DataSheet_1.pdf]

## Supplementary data

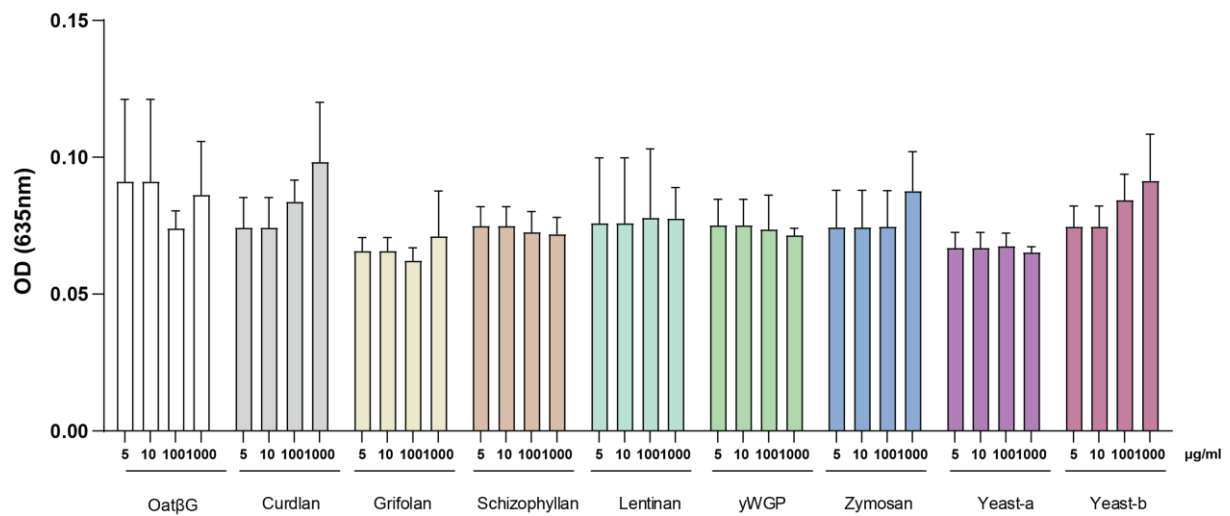

**Supplementary Figure 1. Beta-glucans do not activate the parental cell-line Null1-v that lacks both dectin-1 isoforms.** The parental cell line Null1-v cells were stimulated with 5, 10, 100 or 1000 µg/mL of β-glucans. After 24h stimulation, the secretion of SEAP was quantified in cell-free supernatants. Results of SEAP activity analysis are shown in a bar graph as average values ± SD of absorbance at 635 nm from n = 3 independent experiments.

**Supplementary Table 1.** Correlation of dectin-1a or -1b activation with macrophage secretion of TNF- $\alpha$ , IL-6, lactate or NO.

| Model      | Conc. $\beta$ -glucan ( $\mu$ g/ml) | p-value       | r                 | Read-out parameter/receptor |
|------------|-------------------------------------|---------------|-------------------|-----------------------------|
| Training   | 5                                   | 0,1832        | 0,3218            | IL-6/Dectin-1a              |
|            | 10                                  | 0,3218        | 0,1833            |                             |
|            | 100                                 | 0,1793        | 0,3500            |                             |
|            | 1000                                | 0,1563        | 0,3833            |                             |
|            | 5                                   | 0,1063        | 0,4667            | IL-6/Dectin-1b              |
|            | 10                                  | 0,0809        | 0,5167            |                             |
|            | 100                                 | 0,2183        | 0,3000            |                             |
|            | 1000                                | 0,0809        | 0,5167            |                             |
|            | 5                                   | <b>0,0429</b> | 0,6167            | TNF- $\alpha$ /Dectin-1a    |
|            | 10                                  | 0,0888        | 0,5000            |                             |
|            | 100                                 | 0,0888        | 0,5000            |                             |
|            | 1000                                | 0,1681        | 0,3667            |                             |
|            | 5                                   | <b>0,0107</b> | 0,7667            | TNF- $\alpha$ /Dectin-1b    |
|            | 10                                  | <b>0,0156</b> | 0,7333            |                             |
|            | 100                                 | <b>0,0294</b> | 0,6667            |                             |
|            | 1000                                | <b>0,0333</b> | 0,6500            |                             |
| 5          | 0,1793                              | 0,3500        | Lactate/Dectin-1a |                             |
| 10         | 0,2467                              | 0,2667        |                   |                             |
| 100        | 0,1681                              | 0,3667        |                   |                             |
| 1000       | 0,1348                              | 0,4167        |                   |                             |
| 5          | <b>0,0333</b>                       | 0,6500        | Lactate/Dectin-1b |                             |
| 10         | <b>0,0484</b>                       | 0,6000        |                   |                             |
| 100        | 0,1456                              | 0,4000        |                   |                             |
| 1000       | <b>0,0216</b>                       | 0,7167        |                   |                             |
| 5          | 0,4216                              | -0,0833       | NO/Dectin-1a      |                             |
| 10         | 0,4742                              | -0,0333       |                   |                             |
| 100        | 0,3718                              | 0,1333        |                   |                             |
| 1000       | 0,4558                              | -0,0500       |                   |                             |
| 5          | 0,3878                              | -0,1167       | NO/Dectin-1b      |                             |
| 10         | 0,4742                              | -0,0333       |                   |                             |
| 100        | 0,4742                              | -0,0333       |                   |                             |
| 1000       | 0,3389                              | -0,1667       |                   |                             |
| Resilience | 5                                   | 0,3540        | 0,1500            | IL-6/Dectin-1a              |
|            | 10                                  | 0,3389        | 0,1667            |                             |
|            | 100                                 | 0,1456        | 0,4000            |                             |
|            | 1000                                | 0,0664        | 0,5500            |                             |
|            | 5                                   | 0,1348        | 0,4167            | IL-6/Dectin-1b              |
|            | 10                                  | 0,0888        | 0,5000            |                             |
|            | 100                                 | 0,2183        | 0,3000            |                             |
|            | 1000                                | <b>0,0294</b> | 0,6667            |                             |
|            | 5                                   | 0,1456        | 0,4000            | TNF- $\alpha$ /Dectin-1a    |
|            | 10                                  | 0,2050        | 0,3167            |                             |
|            | 100                                 | 0,1250        | 0,4333            |                             |
|            | 1000                                | 0,1681        | 0,3667            |                             |
|            | 5                                   | 0,0738        | 0,5333            | TNF- $\alpha$ /Dectin-1b    |
|            | 10                                  | 0,0809        | 0,5167            |                             |
|            | 100                                 | 0,1149        | 0,4500            |                             |
|            | 1000                                | 0,0540        | 0,5833            |                             |
|            | 5                                   | 0,1456        | 0,4000            | Lactate/Dectin-1a           |
|            | 10                                  | 0,0969        | 0,4833            |                             |
|            | 100                                 | <b>0,0294</b> | 0,6667            |                             |
|            | 1000                                | 0,0738        | 0,5333            |                             |
|            | 5                                   | 0,1681        | 0,3667            | Lactate/Dectin-1b           |
|            | 10                                  | 0,0969        | 0,4833            |                             |
|            | 100                                 | 0,0888        | 0,5000            |                             |
|            | 1000                                | 0,1348        | 0,4167            |                             |
| 5          | 0,2603                              | -0,2500       | NO/Dectin-1a      |                             |
| 10         | 0,1927                              | -0,3333       |                   |                             |
| 100        | 0,0888                              | 0,5000        |                   |                             |
| 1000       | <b>0,0030</b>                       | -0,8500       |                   |                             |
| 5          | 0,1348                              | -0,4167       | NO/Dectin-1b      |                             |
| 10         | 0,0738                              | -0,5333       |                   |                             |
| 100        | 0,1456                              | -0,4000       |                   |                             |
| 1000       | <b>0,0041</b>                       | -0,8333       |                   |                             |
